# Supplementary material for: Murine Antithymocyte Globulin Therapy Alters Disease Progression in NOD Mice by a Time-Dependent Induction of Immunoregulation
Source: Oxford University Press journal article supplement (doi:10.2337/db06-1384), 2007-11-27
Supplement: db061384-sup-supplementary_table_1.doc [file db061384-sup-supplementary_table_1.doc]

**Supplementary TABLE 1**

Expression of cell surface markers in mATG or rIgG treated NOD mice.

**7 day**  **14 day** **30 day**

*CD28 CD154 CD25 CD28 CD154 CD25 CD28 CD154 CD25*

**mATG**

CD4+ 3.58 (.34)* 30.52 (2.12) 16.85 (2.09)* 2.25 (.51) 31.55 (3.28) 11.06 (.23) 2.01 (.11) 32.14 (1.12) 10.10 (1.0)

CD8+ 2.78 (.12)* 37.42 (1.98) 1.09 (.15) 1.74 (.47) 40.49 (.44) 1.19 (.02) 0.95 (.12) 24.13 (.96) 1.06 (.42)

**rIgG**

CD4+ 1.12 (.32) 35.68 (2.53) 8.30 (.27) 0.82 (.26) 35.59 (2.66) 8.25 (.27) 0.92 (0.21) 33.12 (.98) 8.53 (.60)

CD8+ 0.89 (.19) 34.99 (.94) 1.19 (.18) 0.66 (.16) 34.98 (.95) 0.97 (.17) 0.72 (.09) 27.19 (2.34) 1.13 (.16)

Mice were of the NOD strain and 12 wk of age at injection. Mean (SD) values are shown at days post-injection. No data at

day 0 were obtained. * *P* < 0.05 in mATG vs. rIgG.
